# Supplementary material for: Contributions of deposited particles to pine needle polycyclic aromatic hydrocarbons
Source: Royal Society of Chemistry journal article supplement (doi:10.1039/b708508g), 2007-01-01
Supplement: b708508g.pdf [file b708508g.pdf]

## Appendix A

### Contributions of Deposited Particles to Pine Needle Polycyclic Aromatic Hydrocarbons: A

#### Regional Study in Dalian, China

Ping Yang, Jingwen Chen\*, Zhen Wang, Xianliang Qiao, Xiyun Cai, Fulin Tian, Linke Ge

Key Laboratory of Industrial Ecology and Environmental Engineering, MOE, Dalian University  
of Technology, Dalian 116024, China

\*Corresponding author: Jingwen Chen

Tel/Fax: +86-411-8470 6269, E-mail: [jwchen@dlut.edu.cn](mailto:jwchen@dlut.edu.cn)

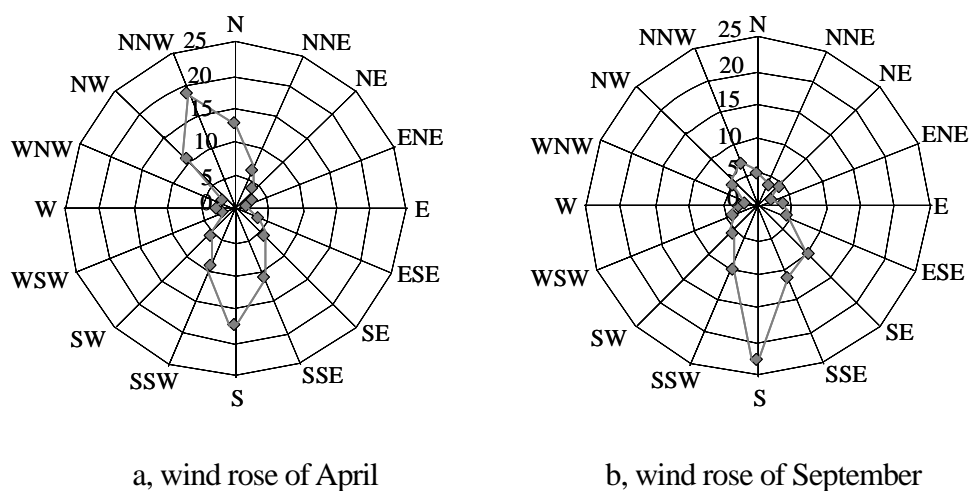

Fig. S1. Plot of April and September wind rose (Data from Dalian Environmental Monitoring Center)
